# Supplementary material for: Changes in the future summer Mediterranean climate: contribution of teleconnections and local factors
Source: Copernicus journal article supplement (doi:10.5194/esd-2018-85), 2019-01-15

## Supplementary Material

Fig S11. As in Fig 11, except that correlations are derived, based on the sample with the 300 coldest (a,b) and 300 warmest (c,d) complete seasons over the eastern Mediterranean in the CTRL run. Correlations are shown for a)-b) meridional wind, c)-d) precipitation.

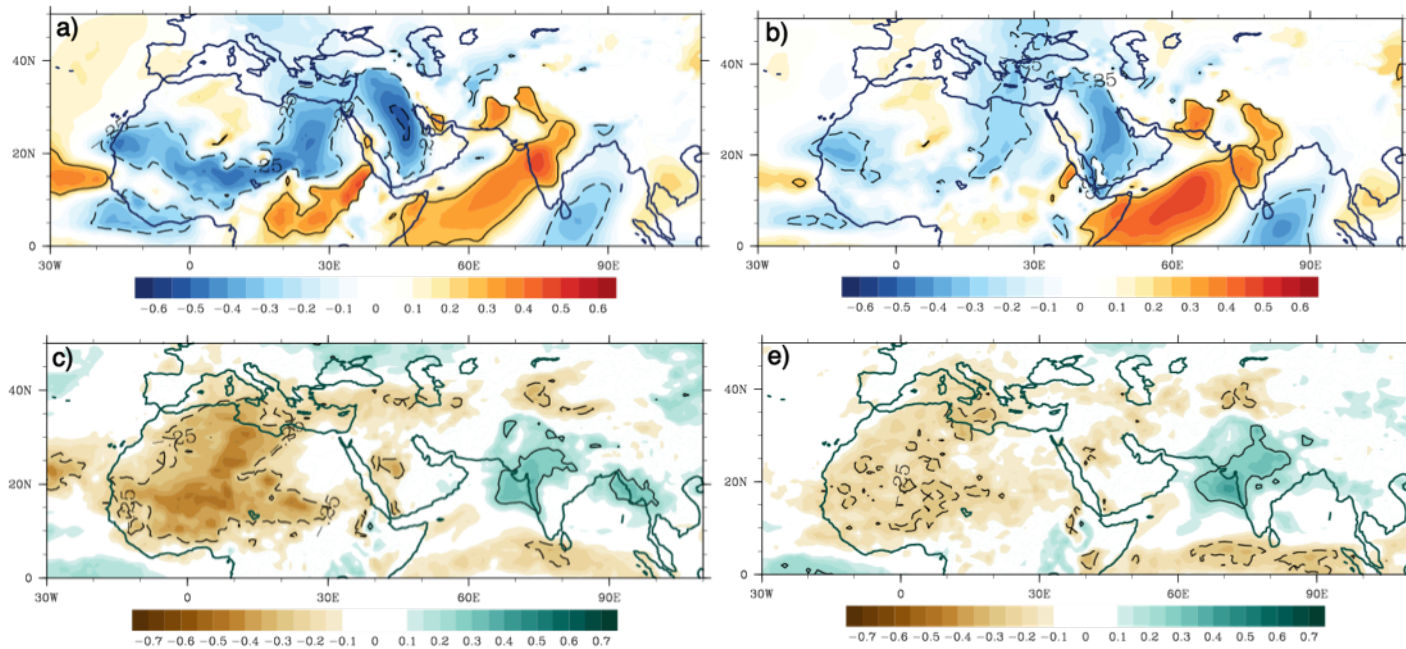

Fig SI2. Projected future changes for the summer total precipitation rate [mm/day], for the period 2061-2099 compared with the baseline period 1961-1999, in July (a) and (b) July-August; and for a larger domain.

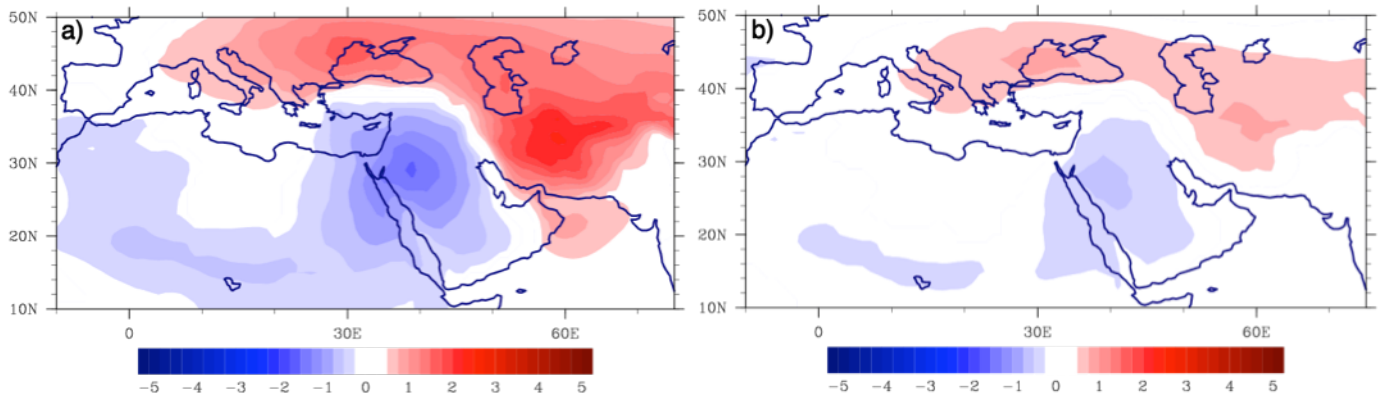

Fig SI3. As in Figure 12, except that the regions used for differentiation between warmest and coolest seasons are larger: a) 0°-40°E, 30°-36°N, b) 20°-40°E, 30°-36°N, c) 30°-50°E, 30°-36°N, d) 30°-50°E, 30°-40°N, e) 30°-50°E, 30°-45°N.

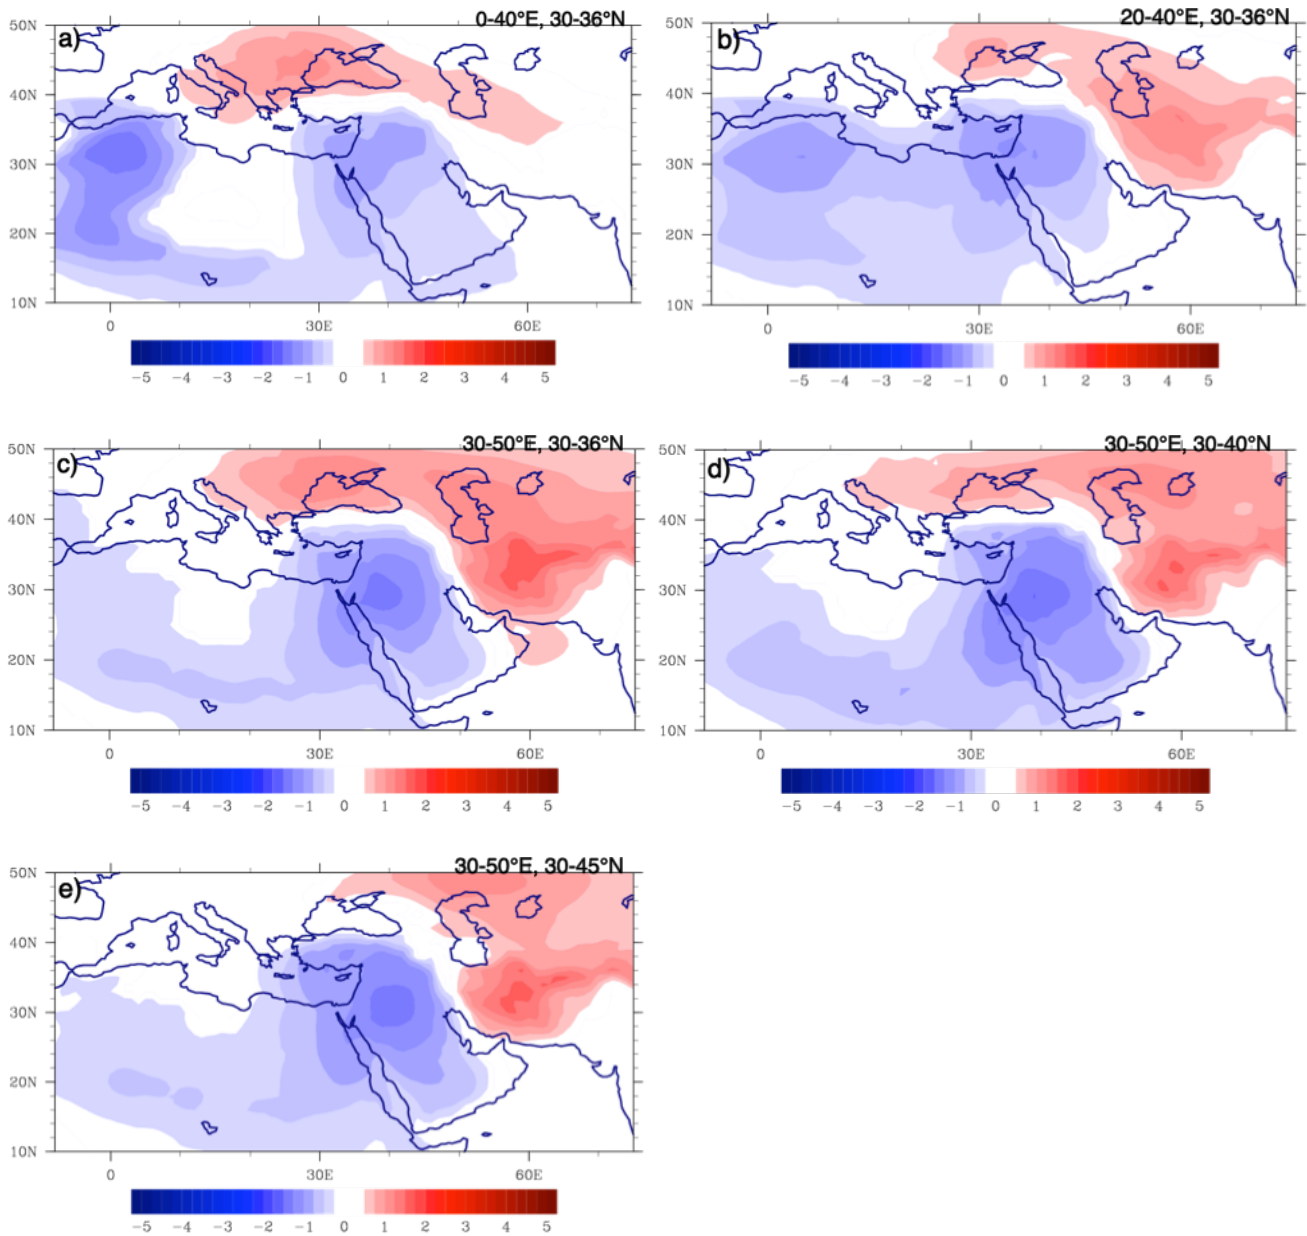

Fig SI4. Future changes projected for vertical velocities at a) 500 hPa, c) 600 hPa, e) 700 hPa in JJA and in July in b), d), f) respectively. The changes are derived in the period 2061-2099 and compared with the baseline period 1961-1999, derived at the original horizontal resolution ( $\sim 0.25^\circ$ ). The vertical axis is oriented downward, i.e. negative tendencies (in blue) indicate upward motion while positive tendencies (red, stronger subsidence) indicate downward motion.

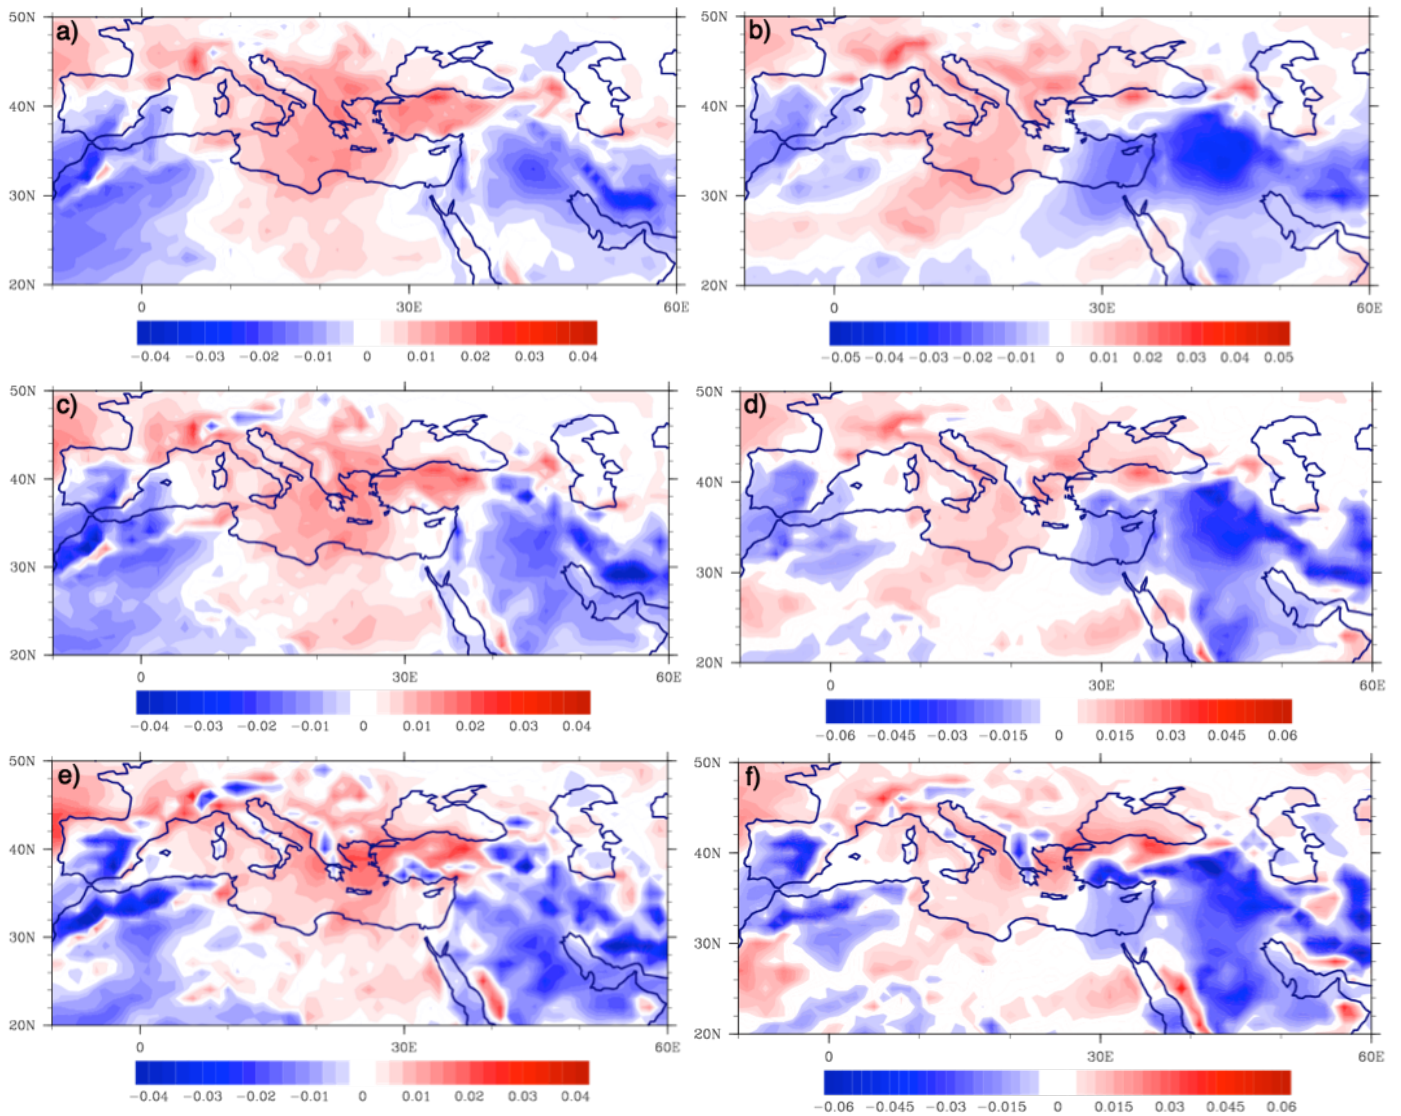

Fig S15. Correlations between the principal component time series of EOF1 omega over EMED and precipitation in (a) June, (b) July (as in Figure 8c), (c) August. Solid lines denote positive correlations, and stippled denote negative correlations, both for the absolute values larger, than 0.25.

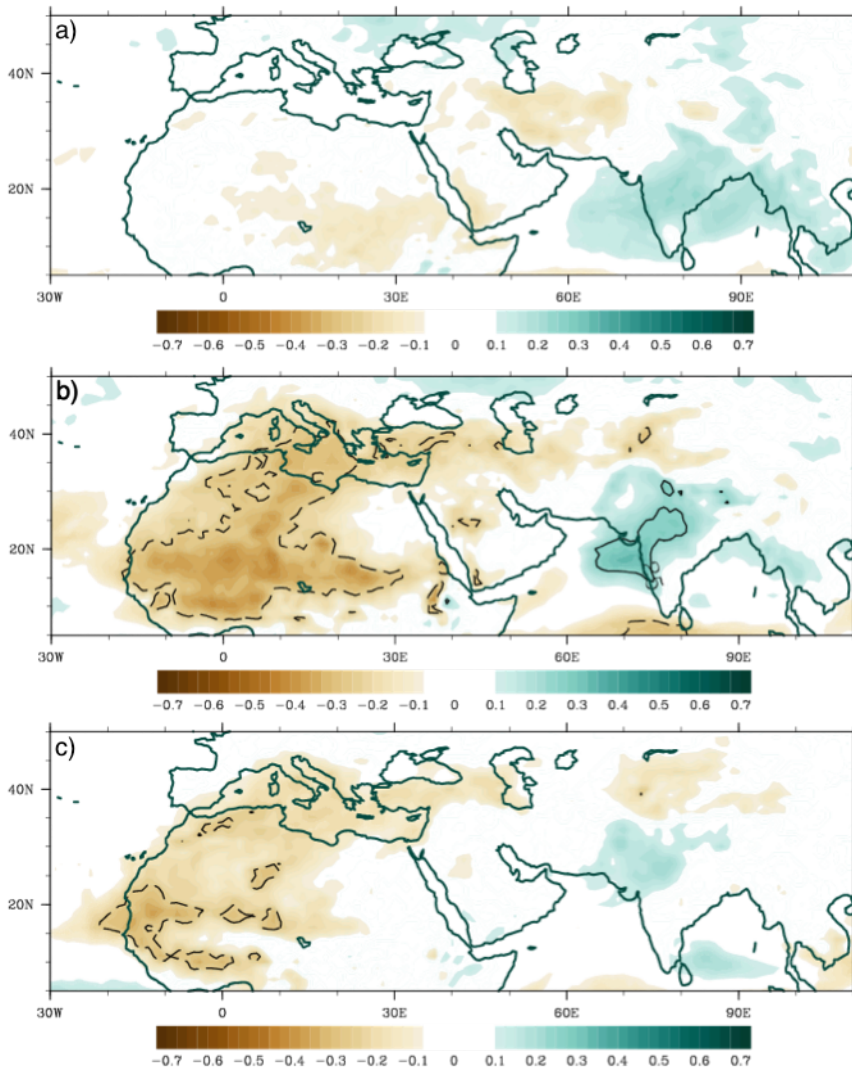

Fig SI6. Spatial patterns of the SNAO using SLP, derived from five HIST runs in 1870-1920 (left column), and 1960-2010 (right column). The pattern is shown as correlations between time series of the first PC of SLP and SLP fields in July-August.

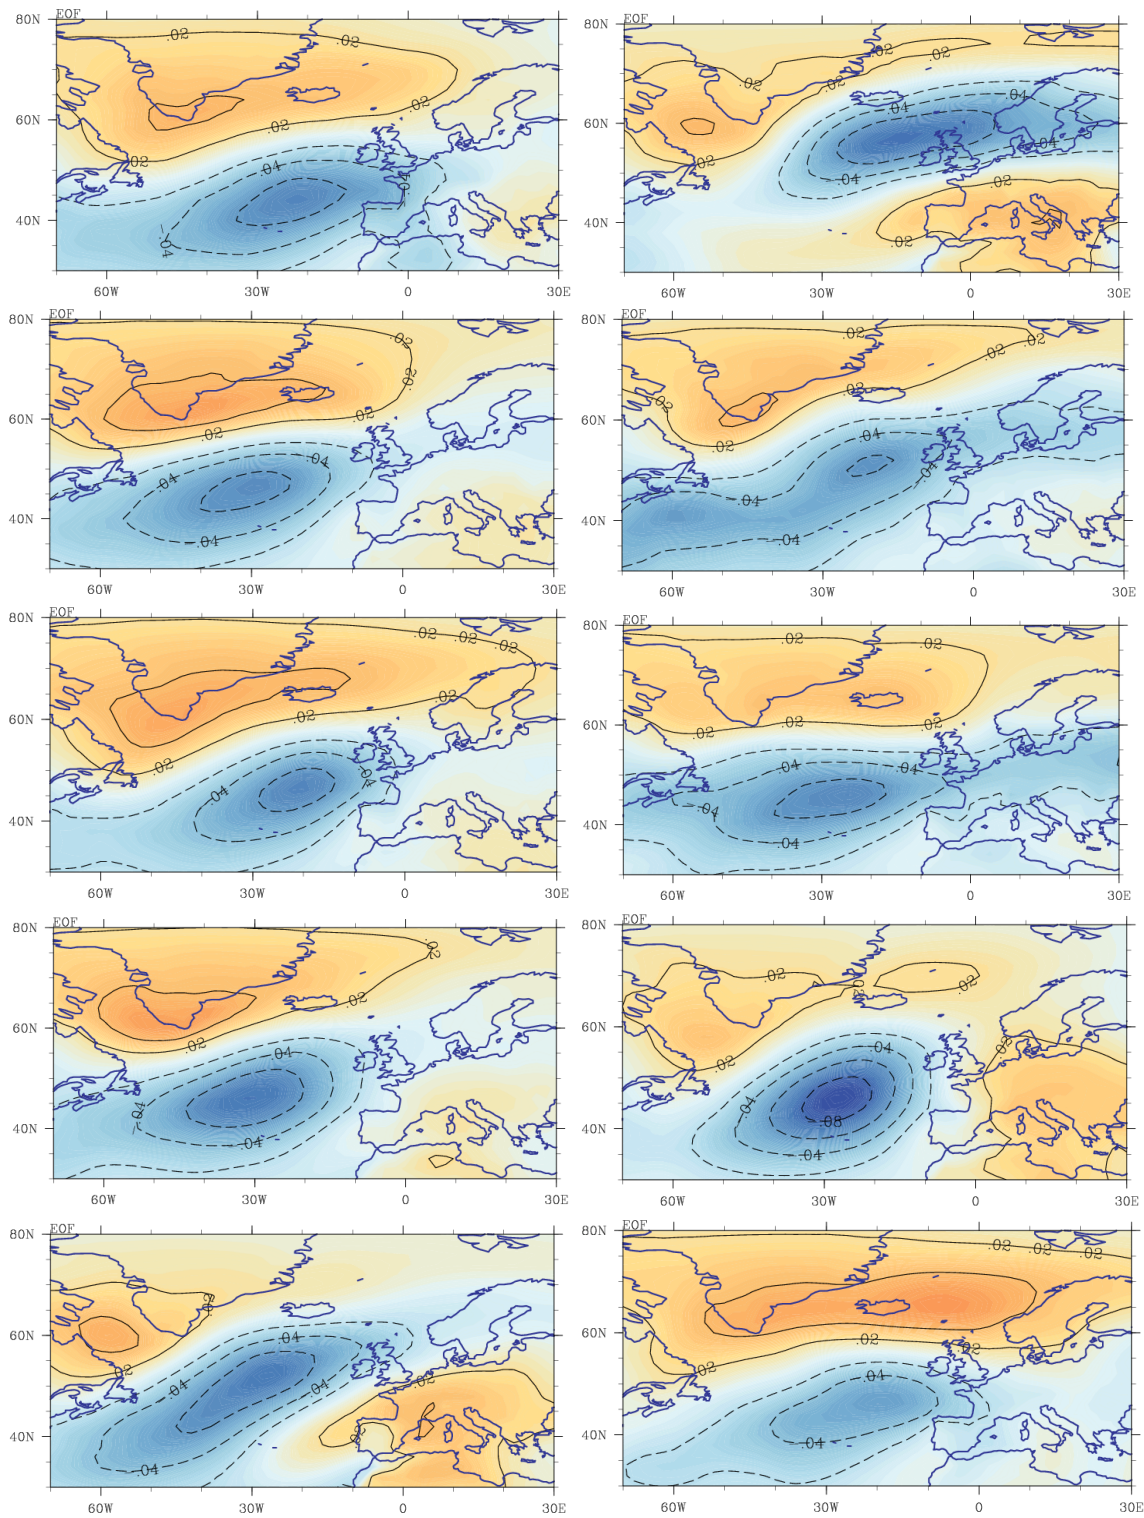

Fig SI7. Spatial pattern of SNAO using SLP derived from the period 1970-2030 in the five HIST+PROJ runs. The pattern is shown as correlations between the principal component time series of the first EOF of SLP and SLP fields in July-August.

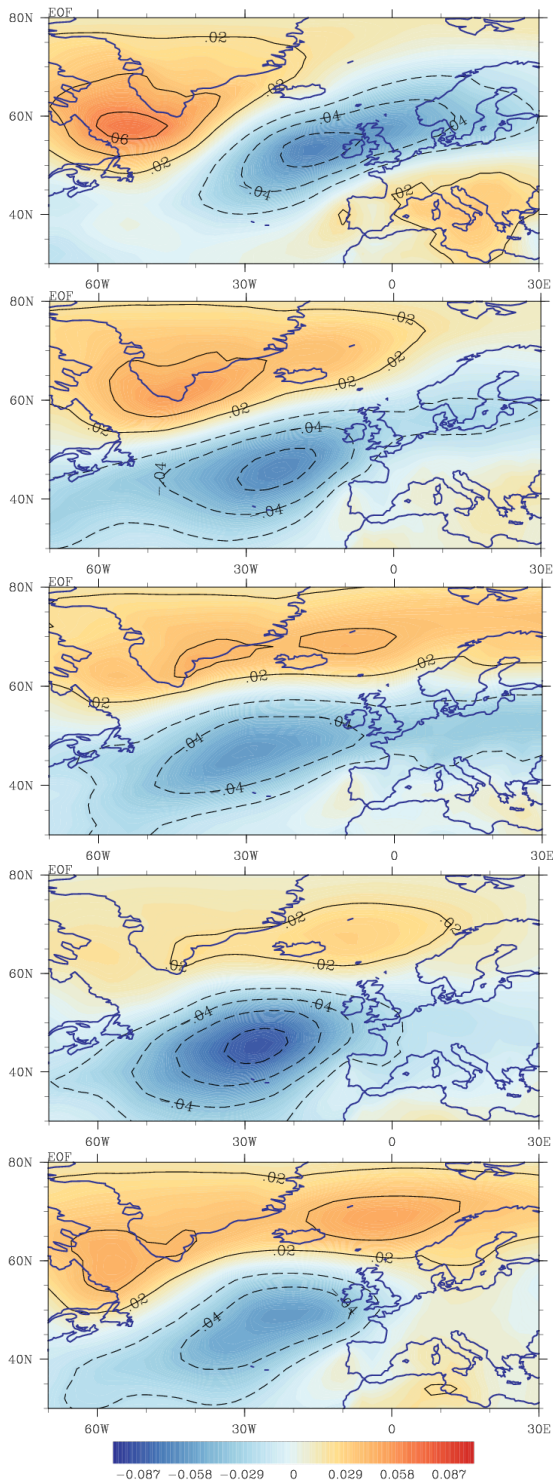

Fig SI8. Spatial pattern of SNAO, derived from the 20CR reanalysis, derived from periods: 1851-1890, 1891-1930, 1931-1970, 1971-2010.

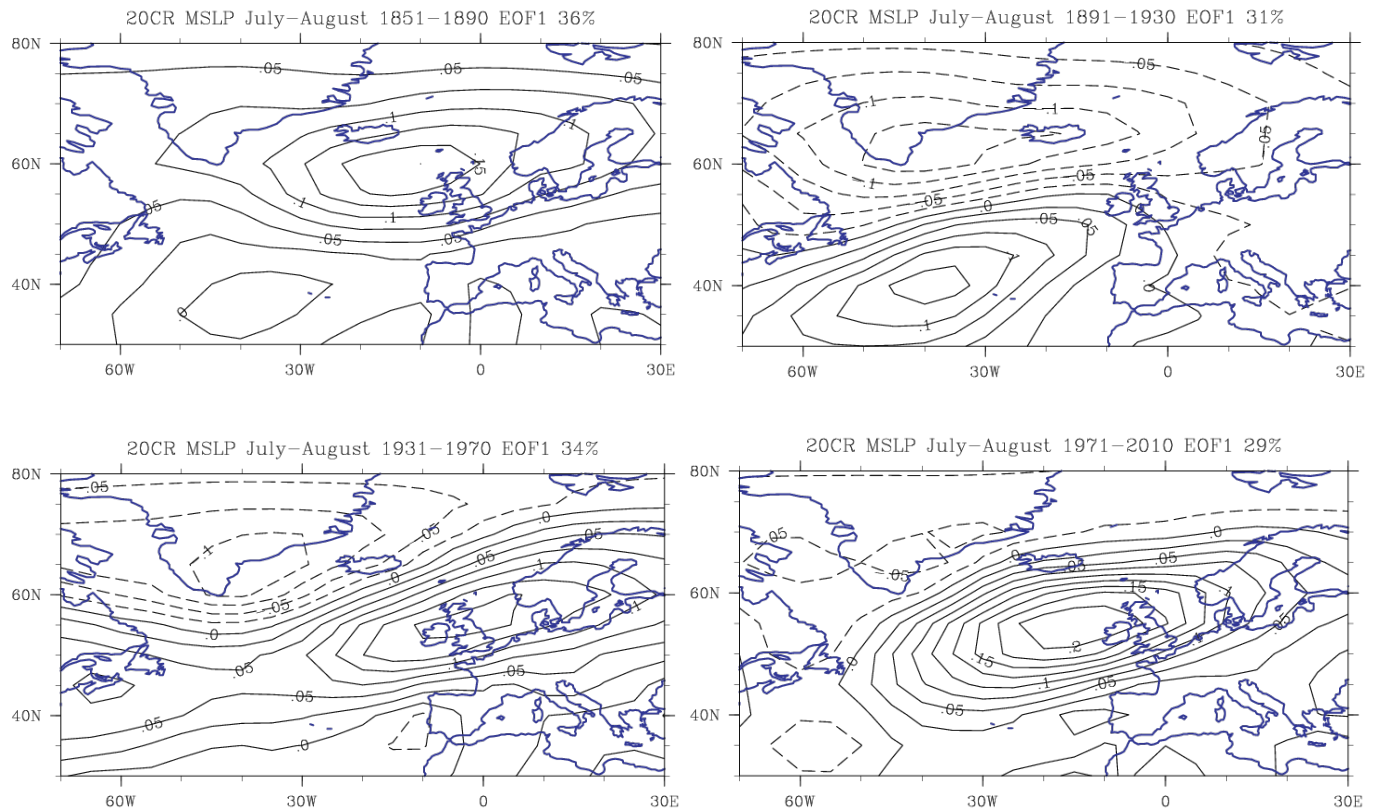

Fig SI9. Spatial pattern of the SNAO, derived from the EMULATE SLP dataset, limited to latitudes up to 70N, for periods: 1851-1890, 1891-1930, 1931-1970, 1971-2010.

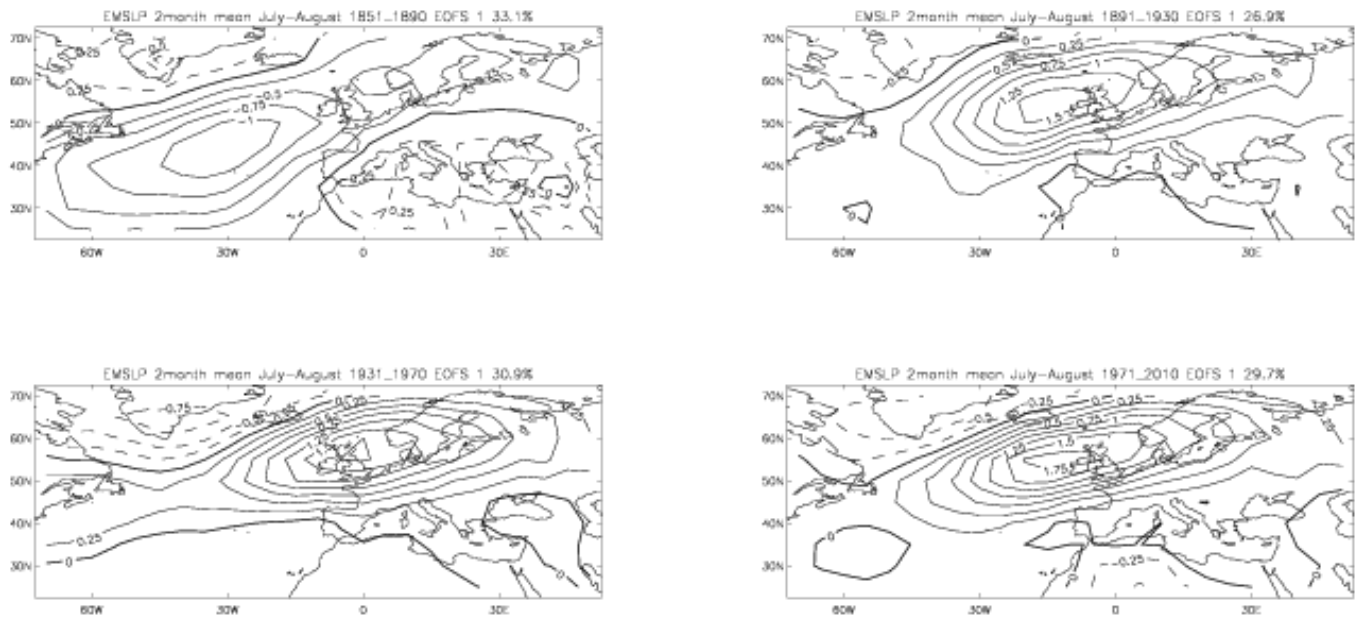

Supplement: Supplementary file 1 [file esd-2018-85-supplement.pdf]
